# Supplementary material for: Pharmacokinetics of Intravenous, Intramuscular, Oral, and Transdermal Administration of Flunixin Meglumine in Pre-wean Piglets
Source: Front Vet Sci. 2020 Aug 28;7:586. doi: 10.3389/fvets.2020.00586 (PMC7485418; doi:10.3389/fvets.2020.00586)
Supplement: Supplemental Table 1 — Individual time-concentration dataset for Phase II. [file Table_1.XLSX]

## Sheet: FlunixinFinal
ID	TIME	AMT	ODV	DV	CENS	ADM	OCC	COV	TOP	MET	CAT
1	0	5830	.	.	0	4	1	2.65	0	1	iv
1	5		4613	4613	0	4	1	2.65	0	1	iv
1	15		8369.72	8369.72	0	4	1	2.65	0	1	iv
1	30		7870.52	7870.52	0	4	1	2.65	0	1	iv
1	45		7678.69	7678.69	0	4	1	2.65	0	1	iv
1	60		6948.15	6948.15	0	4	1	2.65	0	1	iv
1	90		5642.81	5642.81	0	4	1	2.65	0	1	iv
1	120		4889.98	4889.98	0	4	1	2.65	0	1	iv
1	180		4913.49	4913.49	0	4	1	2.65	0	1	iv
1	360		1155.31	1155.31	0	4	1	2.65	0	1	iv
1	720		620.726	620.726	0	4	1	2.65	0	1	iv
1	1440		337.969	337.969	0	4	1	2.65	0	1	iv
1	2160		111.539	111.539	0	4	1	2.65	0	1	iv
1	2880		50.2492	50.2492	0	4	1	2.65	0	1	iv
1	3600		27.268	27.268	0	4	1	2.65	0	1	iv
9	0	9174	.	.	0	4	1	4.17	0	1	iv
9	5		13684.5	13684.5	0	4	1	4.17	0	1	iv
9	15		11053.7	11053.7	0	4	1	4.17	0	1	iv
9	30		8212.3	8212.3	0	4	1	4.17	0	1	iv
9	45		8936.6	8936.6	0	4	1	4.17	0	1	iv
9	60		7834.75	7834.75	0	4	1	4.17	0	1	iv
9	90		5930.23	5930.23	0	4	1	4.17	0	1	iv
9	120		4648.57	4648.57	0	4	1	4.17	0	1	iv
9	180		3289.7	3289.7	0	4	1	4.17	0	1	iv
9	360		1448.53	1448.53	0	4	1	4.17	0	1	iv
9	720		880.106	880.106	0	4	1	4.17	0	1	iv
9	1440		333.631	333.631	0	4	1	4.17	0	1	iv
9	2160		132.653	132.653	0	4	1	4.17	0	1	iv
9	2880		39.2311	39.2311	0	4	1	4.17	0	1	iv
9	3600		17.489	17.489	0	4	1	4.17	0	1	iv
10	0	6072	.	.	0	4	1	2.76	0	1	iv
10	5		6775.33	6775.33	0	4	1	2.76	0	1	iv
10	15		8315.92	8315.92	0	4	1	2.76	0	1	iv
10	30		7421.71	7421.71	0	4	1	2.76	0	1	iv
10	45		6599.72	6599.72	0	4	1	2.76	0	1	iv
10	60		6213.63	6213.63	0	4	1	2.76	0	1	iv
10	90		4621.2	4621.2	0	4	1	2.76	0	1	iv
10	120		3050.3	3050.3	0	4	1	2.76	0	1	iv
10	180		2149.99	2149.99	0	4	1	2.76	0	1	iv
10	360		613.883	613.883	0	4	1	2.76	0	1	iv
10	720		234.009	234.009	0	4	1	2.76	0	1	iv
10	1440		40.2308	40.2308	0	4	1	2.76	0	1	iv
10	2160		16.9959	16.9959	0	4	1	2.76	0	1	iv
10	2880		7.08827	7.08827	0	4	1	2.76	0	1	iv
10	3600		9.23228	9.23228	0	4	1	2.76	0	1	iv
11	0	7238	.	.	0	4	1	3.29	0	1	iv
11	5		4041.01	4041.01	0	4	1	3.29	0	1	iv
11	15		5393.45	5393.45	0	4	1	3.29	0	1	iv
11	30		5850.06	5850.06	0	4	1	3.29	0	1	iv
11	45		5995.86	5995.86	0	4	1	3.29	0	1	iv
11	60		6196.35	6196.35	0	4	1	3.29	0	1	iv
11	90		12727.5	12727.5	0	4	1	3.29	0	1	iv
11	120		5638.57	5638.57	0	4	1	3.29	0	1	iv
11	180		5604.1	5604.1	0	4	1	3.29	0	1	iv
11	360		1047.62	1047.62	0	4	1	3.29	0	1	iv
11	720		606.208	606.208	0	4	1	3.29	0	1	iv
11	1440		123.72	123.72	0	4	1	3.29	0	1	iv
11	2160		31.5288	31.5288	0	4	1	3.29	0	1	iv
11	2880		12.9194	12.9194	0	4	1	3.29	0	1	iv
11	3600		5.60532	5.60532	0	4	1	3.29	0	1	iv
12	0	9218	.	.	0	4	1	4.19	0	1	ivsc
12	5		3453.84	.	0	4	1	4.19	0	1	ivsc
12	15		4200.63	.	0	4	1	4.19	0	1	ivsc
12	30		6515.18	.	0	4	1	4.19	0	1	ivsc
12	45		4560.37	.	0	4	1	4.19	0	1	ivsc
12	60		7111.07	7111.07	0	4	1	4.19	0	1	ivsc
12	90		5619.11	5619.11	0	4	1	4.19	0	1	ivsc
12	120		5771.04	5771.04	0	4	1	4.19	0	1	ivsc
12	180		2974.26	2974.26	0	4	1	4.19	0	1	ivsc
12	360		1044.82	1044.82	0	4	1	4.19	0	1	ivsc
12	720		898.951	898.951	0	4	1	4.19	0	1	ivsc
12	1440		147.044	147.044	0	4	1	4.19	0	1	ivsc
12	2160		76.528	76.528	0	4	1	4.19	0	1	ivsc
12	2880		19.3002	19.3002	0	4	1	4.19	0	1	ivsc
12	3600		8.1176	8.1176	0	4	1	4.19	0	1	ivsc
13	0	6952	.	.	0	4	1	3.16	0	1	iv
13	5		16237.1	16237.1	0	4	1	3.16	0	1	iv
13	15		11893.3	11893.3	0	4	1	3.16	0	1	iv
13	30		11528.8	11528.8	0	4	1	3.16	0	1	iv
13	45		8859.43	8859.43	0	4	1	3.16	0	1	iv
13	60		7806.53	7806.53	0	4	1	3.16	0	1	iv
13	90		6135.91	6135.91	0	4	1	3.16	0	1	iv
13	120		5469.35	5469.35	0	4	1	3.16	0	1	iv
13	180		2550.88	2550.88	0	4	1	3.16	0	1	iv
13	360		574.459	574.459	0	4	1	3.16	0	1	iv
13	720		155.714	155.714	0	4	1	3.16	0	1	iv
13	1440		35.2525	35.2525	0	4	1	3.16	0	1	iv
13	2160		16.2696	16.2696	0	4	1	3.16	0	1	iv
13	2880		4.77636	4.77636	0	4	1	3.16	0	1	iv
13	3600		2.32967	2.32967	0	4	1	3.16	0	1	iv
14	0	8580	.	.	0	4	1	3.9	0	1	ivsc
14	5		3666.34	.	0	4	1	3.9	0	1	ivsc
14	15		4648.57	.	0	4	1	3.9	0	1	ivsc
14	30		4480.42	.	0	4	1	3.9	0	1	ivsc
14	45		5473.53	.	0	4	1	3.9	0	1	ivsc
14	60		4807.03	.	0	4	1	3.9	0	1	ivsc
14	90		3994.03	.	0	4	1	3.9	0	1	ivsc
14	120		3802.14	.	0	4	1	3.9	0	1	ivsc
14	180		5445.32	5445.32	0	4	1	3.9	0	1	ivsc
14	360		1051.72	1051.72	0	4	1	3.9	0	1	ivsc
14	720		619.607	619.607	0	4	1	3.9	0	1	ivsc
14	1440		99.3024	99.3024	0	4	1	3.9	0	1	ivsc
14	2160		28.218	28.218	0	4	1	3.9	0	1	ivsc
14	2880		11.3982	11.3982	0	4	1	3.9	0	1	ivsc
14	3600		4.59243	4.59243	0	4	1	3.9	0	1	ivsc
15	0	8558	.	.	0	4	1	3.89	0	1	iv
15	5		16718.3	16718.3	0	4	1	3.89	0	1	iv
15	15		12926.5	12926.5	0	4	1	3.89	0	1	iv
15	30		12599.3	12599.3	0	4	1	3.89	0	1	iv
15	45		9957.99	9957.99	0	4	1	3.89	0	1	iv
15	60		9025.19	9025.19	0	4	1	3.89	0	1	iv
15	90		8128.87	8128.87	0	4	1	3.89	0	1	iv
15	120		7119.68	7119.68	0	4	1	3.89	0	1	iv
15	180		4307.9	4307.9	0	4	1	3.89	0	1	iv
15	360		1905.23	1905.23	0	4	1	3.89	0	1	iv
15	720		948.269	948.269	0	4	1	3.89	0	1	iv
15	1440		306.319	306.319	0	4	1	3.89	0	1	iv
15	2160		100.961	100.961	0	4	1	3.89	0	1	iv
15	2880		31.1085	31.1085	0	4	1	3.89	0	1	iv
15	3600		17.3545	17.3545	0	4	1	3.89	0	1	iv
16	0	10350	.	.	0	2	1	3.55	1	0	topical
16	45		2.24378	2.24378	0	2	1	3.55	1	0	topical
16	90		2.05974	2.05974	0	2	1	3.55	1	0	topical
16	120		6.69362	6.69362	0	2	1	3.55	1	0	topical
16	180		12.8666	12.8666	0	2	1	3.55	1	0	topical
16	360		21.7807	21.7807	0	2	1	3.55	1	0	topical
16	720		37.5768	37.5768	0	2	1	3.55	1	0	topical
16	1440		64.3839	64.3839	0	2	1	3.55	1	0	topical
16	2160		50.8277	50.8277	0	2	1	3.55	1	0	topical
16	2880		36.1541	36.1541	0	2	1	3.55	1	0	topical
16	3600		28.9491	28.9491	0	2	1	3.55	1	0	topical
16	4320		20.9864	20.9864	0	2	1	3.55	1	0	topical
16	5040		15.4963	15.4963	0	2	1	3.55	1	0	topical
16	5760		11.1694	11.1694	0	2	1	3.55	1	0	topical
16	6480		7.07834	7.07834	0	2	1	3.55	1	0	topical
16	7200		5.54688	5.54688	0	2	1	3.55	1	0	topical
16	7920		6.14573	6.14573	0	2	1	3.55	1	0	topical
16	8640		5.11909	5.11909	0	2	1	3.55	1	0	topical
16	9360		4.73201	4.73201	0	2	1	3.55	1	0	topical
16	10080		5.65676	5.65676	0	2	1	3.55	1	0	topical
16	10800		4.63583	4.63583	0	2	1	3.55	1	0	topical
16	11520		2.75756	2.75756	0	2	1	3.55	1	0	topical
16	12240		2.45746	2.45746	0	2	1	3.55	1	0	topical
2	0	7900	.	.	0	2	1	2.55	1	0	topical
2	45		11.487	11.487	0	2	1	2.55	1	0	topical
2	60		43.4403	43.4403	0	2	1	2.55	1	0	topical
2	90		54.5832	54.5832	0	2	1	2.55	1	0	topical
2	120		38.1	38.1	0	2	1	2.55	1	0	topical
2	180		31.7804	31.7804	0	2	1	2.55	1	0	topical
2	360		18.8056	18.8056	0	2	1	2.55	1	0	topical
2	720		21.0038	21.0038	0	2	1	2.55	1	0	topical
2	1440		33.974	33.974	0	2	1	2.55	1	0	topical
2	2160		24.4904	24.4904	0	2	1	2.55	1	0	topical
2	2880		33.1289	33.1289	0	2	1	2.55	1	0	topical
2	3600		32.4101	32.4101	0	2	1	2.55	1	0	topical
2	4320		20.3667	20.3667	0	2	1	2.55	1	0	topical
2	5040		18.6646	18.6646	0	2	1	2.55	1	0	topical
2	5760		16.7682	16.7682	0	2	1	2.55	1	0	topical
2	6480		13.848	13.848	0	2	1	2.55	1	0	topical
2	7200		9.77719	9.77719	0	2	1	2.55	1	0	topical
2	7920		12.5488	12.5488	0	2	1	2.55	1	0	topical
2	8640		8.85069	8.85069	0	2	1	2.55	1	0	topical
2	9360		4.72152	4.72152	0	2	1	2.55	1	0	topical
2	10080		3.56535	3.56535	0	2	1	2.55	1	0	topical
2	10800		4.35658	4.35658	0	2	1	2.55	1	0	topical
2	11520		3.71731	3.71731	0	2	1	2.55	1	0	topical
2	12240		4.83505	4.83505	0	2	1	2.55	1	0	topical
2	12960		2.58944	2.58944	0	2	1	2.55	1	0	topical
3	0	8830	.	.	0	2	1	2.92	1	0	topical
3	90		5.23366	5.23366	0	2	1	2.92	1	0	topical
3	120		9.80706	9.80706	0	2	1	2.92	1	0	topical
3	180		17.5252	17.5252	0	2	1	2.92	1	0	topical
3	360		28.1502	28.1502	0	2	1	2.92	1	0	topical
3	720		37.1944	37.1944	0	2	1	2.92	1	0	topical
3	1440		34.8386	34.8386	0	2	1	2.92	1	0	topical
3	2160		33.1638	33.1638	0	2	1	2.92	1	0	topical
3	2880		23.5244	23.5244	0	2	1	2.92	1	0	topical
3	3600		24.7218	24.7218	0	2	1	2.92	1	0	topical
3	4320		20.0257	20.0257	0	2	1	2.92	1	0	topical
3	5040		12.368	12.368	0	2	1	2.92	1	0	topical
3	5760		9.31991	9.31991	0	2	1	2.92	1	0	topical
3	6480		6.14325	6.14325	0	2	1	2.92	1	0	topical
3	7200		2.73735	2.73735	0	2	1	2.92	1	0	topical
3	7920		11.349	11.349	0	2	1	2.92	1	0	topical
3	8640		16.7327	16.7327	0	2	1	2.92	1	0	topical
3	9360		2.88044	2.88044	0	2	1	2.92	1	0	topical
3	10080		2.49828	2.49828	0	2	1	2.92	1	0	topical
3	10800		3.96274	3.96274	0	2	1	2.92	1	0	topical
3	11520		2.55971	2.55971	0	2	1	2.92	1	0	topical
3	12240		2.12222	2.12222	0	2	1	2.92	1	0	topical
4	0	12800	.	.	0	2	1	3.96	1	0	topical
4	30		2.61933	2.61933	0	2	1	3.96	1	0	topical
4	45		5.60128	5.60128	0	2	1	3.96	1	0	topical
4	60		11.5461	11.5461	0	2	1	3.96	1	0	topical
4	90		18.998	18.998	0	2	1	3.96	1	0	topical
4	120		23.6992	23.6992	0	2	1	3.96	1	0	topical
4	180		29.7678	29.7678	0	2	1	3.96	1	0	topical
4	360		36.498	36.498	0	2	1	3.96	1	0	topical
4	720		55.3313	55.3313	0	2	1	3.96	1	0	topical
4	1440		118.489	118.489	0	2	1	3.96	1	0	topical
4	2160		72.7234	72.7234	0	2	1	3.96	1	0	topical
4	2880		61.4601	61.4601	0	2	1	3.96	1	0	topical
4	3600		36.8419	36.8419	0	2	1	3.96	1	0	topical
4	4320		30.3443	30.3443	0	2	1	3.96	1	0	topical
4	5040		24.8886	24.8886	0	2	1	3.96	1	0	topical
4	5760		16.3437	16.3437	0	2	1	3.96	1	0	topical
4	6480		13.4108	13.4108	0	2	1	3.96	1	0	topical
4	7200		11.6039	11.6039	0	2	1	3.96	1	0	topical
4	7920		16.3167	16.3167	0	2	1	3.96	1	0	topical
4	8640		10.7146	10.7146	0	2	1	3.96	1	0	topical
4	9360		9.19091	9.19091	0	2	1	3.96	1	0	topical
4	10080		5.82297	5.82297	0	2	1	3.96	1	0	topical
4	10800		5.16694	5.16694	0	2	1	3.96	1	0	topical
4	11520		4.02374	4.02374	0	2	1	3.96	1	0	topical
4	12240		2.6921	2.6921	0	2	1	3.96	1	0	topical
4	12960		2.13637	2.13637	0	2	1	3.96	1	0	topical
5	0	11200	.	.	0	2	1	3.6	1	0	topical
5	90		1.72556	1.72556	0	2	1	3.6	1	0	topical
5	120		2.97455	2.97455	0	2	1	3.6	1	0	topical
5	180		7.02966	7.02966	0	2	1	3.6	1	0	topical
5	360		9.5516	9.5516	0	2	1	3.6	1	0	topical
5	720		16.1286	16.1286	0	2	1	3.6	1	0	topical
5	1440		27.5491	27.5491	0	2	1	3.6	1	0	topical
5	2160		19.1918	19.1918	0	2	1	3.6	1	0	topical
5	2880		16.7077	16.7077	0	2	1	3.6	1	0	topical
5	3600		11.7812	11.7812	0	2	1	3.6	1	0	topical
5	4320		10.2585	10.2585	0	2	1	3.6	1	0	topical
5	5040		6.53381	6.53381	0	2	1	3.6	1	0	topical
5	5760		9.30259	9.30259	0	2	1	3.6	1	0	topical
5	6480		4.53324	4.53324	0	2	1	3.6	1	0	topical
5	7200		5.43096	5.43096	0	2	1	3.6	1	0	topical
5	7920		8.84455	8.84455	0	2	1	3.6	1	0	topical
5	8640		4.94365	4.94365	0	2	1	3.6	1	0	topical
5	9360		4.19823	4.19823	0	2	1	3.6	1	0	topical
5	10080		2.94511	2.94511	0	2	1	3.6	1	0	topical
5	10800		3.52799	3.52799	0	2	1	3.6	1	0	topical
5	11520		2.00818	2.00818	0	2	1	3.6	1	0	topical
5	12240		2.42194	2.42194	0	2	1	3.6	1	0	topical
5	12960		2.66967	2.66967	0	2	1	3.6	1	0	topical
6	0	10720	.	.	0	2	1	3.63	1	0	topical
6	60		2.43912	2.43912	0	2	1	3.63	1	0	topical
6	90		5.0616	5.0616	0	2	1	3.63	1	0	topical
6	120		6.75282	6.75282	0	2	1	3.63	1	0	topical
6	180		17.0301	17.0301	0	2	1	3.63	1	0	topical
6	360		21.2297	21.2297	0	2	1	3.63	1	0	topical
6	720		22.7384	22.7384	0	2	1	3.63	1	0	topical
6	1440		28.9931	28.9931	0	2	1	3.63	1	0	topical
6	2160		17.768	17.768	0	2	1	3.63	1	0	topical
6	2880		18.972	18.972	0	2	1	3.63	1	0	topical
6	3600		10.7641	10.7641	0	2	1	3.63	1	0	topical
6	4320		9.26173	9.26173	0	2	1	3.63	1	0	topical
6	5040		7.12899	7.12899	0	2	1	3.63	1	0	topical
6	5760		5.64486	5.64486	0	2	1	3.63	1	0	topical
6	6480		4.06682	4.06682	0	2	1	3.63	1	0	topical
6	7200		3.65424	3.65424	0	2	1	3.63	1	0	topical
6	7920		4.65854	4.65854	0	2	1	3.63	1	0	topical
6	8640		3.93742	3.93742	0	2	1	3.63	1	0	topical
6	9360		3.90333	3.90333	0	2	1	3.63	1	0	topical
6	10080		2.40878	2.40878	0	2	1	3.63	1	0	topical
6	10800		2.10552	2.10552	0	2	1	3.63	1	0	topical
6	11520		2.16073	2.16073	0	2	1	3.63	1	0	topical
7	0	9650	.	.	0	2	1	2.99	1	0	topical
7	90		2.29841	2.29841	0	2	1	2.99	1	0	topical
7	120		3.59996	3.59996	0	2	1	2.99	1	0	topical
7	180		5.58714	5.58714	0	2	1	2.99	1	0	topical
7	360		17.5366	17.5366	0	2	1	2.99	1	0	topical
7	720		20.502	20.502	0	2	1	2.99	1	0	topical
7	1440		40.0242	40.0242	0	2	1	2.99	1	0	topical
7	2160		30.7756	30.7756	0	2	1	2.99	1	0	topical
7	2880		37.1341	37.1341	0	2	1	2.99	1	0	topical
7	3600		37.0384	37.0384	0	2	1	2.99	1	0	topical
7	4320		34.8	34.8	0	2	1	2.99	1	0	topical
7	5040		14.4435	14.4435	0	2	1	2.99	1	0	topical
7	5760		8.34022	8.34022	0	2	1	2.99	1	0	topical
7	6480		6.19214	6.19214	0	2	1	2.99	1	0	topical
7	7200		5.28096	5.28096	0	2	1	2.99	1	0	topical
7	7920		7.02625	7.02625	0	2	1	2.99	1	0	topical
7	8640		5.18353	5.18353	0	2	1	2.99	1	0	topical
7	9360		4.63914	4.63914	0	2	1	2.99	1	0	topical
7	10080		3.92813	3.92813	0	2	1	2.99	1	0	topical
7	10800		2.25677	2.25677	0	2	1	2.99	1	0	topical
8	0	11110	.	.	0	2	1	3.59	1	0	topical
8	90		4.47913	4.47913	0	2	1	3.59	1	0	topical
8	120		5.34192	5.34192	0	2	1	3.59	1	0	topical
8	180		15.7858	15.7858	0	2	1	3.59	1	0	topical
8	360		18.7047	18.7047	0	2	1	3.59	1	0	topical
8	720		36.274	36.274	0	2	1	3.59	1	0	topical
8	1440		47.451	47.451	0	2	1	3.59	1	0	topical
8	2160		39.4396	39.4396	0	2	1	3.59	1	0	topical
8	2880		34.7669	34.7669	0	2	1	3.59	1	0	topical
8	3600		28.5243	28.5243	0	2	1	3.59	1	0	topical
8	4320		21.7763	21.7763	0	2	1	3.59	1	0	topical
8	5040		12.7441	12.7441	0	2	1	3.59	1	0	topical
8	5760		11.4572	11.4572	0	2	1	3.59	1	0	topical
8	6480		8.71252	8.71252	0	2	1	3.59	1	0	topical
8	7200		6.78035	6.78035	0	2	1	3.59	1	0	topical
8	7920		7.04502	7.04502	0	2	1	3.59	1	0	topical
8	8640		5.08471	5.08471	0	2	1	3.59	1	0	topical
8	9360		3.84217	3.84217	0	2	1	3.59	1	0	topical
8	10080		2.8567	2.8567	0	2	1	3.59	1	0	topical
8	10800		2.74646	2.74646	0	2	1	3.59	1	0	topical
8	11520		2.13373	2.13373	0	2	1	3.59	1	0	topical
1	0	18200	.	.	0	2	2	5.6	1	1	topical
1	30		2.49372	2.49372	0	2	2	5.6	1	1	topical
1	45		3.51897	3.51897	0	2	2	5.6	1	1	topical
1	60		4.27122	4.27122	0	2	2	5.6	1	1	topical
1	90		6.70934	6.70934	0	2	2	5.6	1	1	topical
1	120		9.17575	9.17575	0	2	2	5.6	1	1	topical
1	180		9.08225	9.08225	0	2	2	5.6	1	1	topical
1	360		14.637	14.637	0	2	2	5.6	1	1	topical
1	720		18.3383	18.3383	0	2	2	5.6	1	1	topical
1	1440		21.7033	21.7033	0	2	2	5.6	1	1	topical
1	2160		21.2624	21.2624	0	2	2	5.6	1	1	topical
1	2880		17.893	17.893	0	2	2	5.6	1	1	topical
1	3600		15.173	15.173	0	2	2	5.6	1	1	topical
1	4320		11.6046	11.6046	0	2	2	5.6	1	1	topical
1	5040		8.60716	8.60716	0	2	2	5.6	1	1	topical
1	5760		6.39979	6.39979	0	2	2	5.6	1	1	topical
1	6480		4.14379	4.14379	0	2	2	5.6	1	1	topical
1	7200		2.94236	2.94236	0	2	2	5.6	1	1	topical
1	7920		2.72347	2.72347	0	2	2	5.6	1	1	topical
1	9360		2.50563	2.50563	0	2	2	5.6	1	1	topical
9	0	26620	.	.	0	2	2	8.4	1	1	topical
9	90		3.07014	3.07014	0	2	2	8.4	1	1	topical
9	120		6.02921	6.02921	0	2	2	8.4	1	1	topical
9	180		8.55413	8.55413	0	2	2	8.4	1	1	topical
9	360		9.5051	9.5051	0	2	2	8.4	1	1	topical
9	720		10.4916	10.4916	0	2	2	8.4	1	1	topical
9	1440		13.3721	13.3721	0	2	2	8.4	1	1	topical
9	2160		12.67	12.67	0	2	2	8.4	1	1	topical
9	2880		11.5866	11.5866	0	2	2	8.4	1	1	topical
9	3600		10.6906	10.6906	0	2	2	8.4	1	1	topical
9	4320		12.8419	12.8419	0	2	2	8.4	1	1	topical
9	5040		8.33466	8.33466	0	2	2	8.4	1	1	topical
9	5760		9.13556	9.13556	0	2	2	8.4	1	1	topical
9	6480		3.92376	3.92376	0	2	2	8.4	1	1	topical
9	7200		2.75151	2.75151	0	2	2	8.4	1	1	topical
9	7920		2.26268	2.26268	0	2	2	8.4	1	1	topical
9	9360		2.17215	2.17215	0	2	2	8.4	1	1	topical
9	10800		2.29038	2.29038	0	2	2	8.4	1	1	topical
10	0	18260	.	.	0	2	2	5.8	1	1	topical
10	30		3.85577	3.85577	0	2	2	5.8	1	1	topical
10	45		5.61231	5.61231	0	2	2	5.8	1	1	topical
10	60		8.7551	8.7551	0	2	2	5.8	1	1	topical
10	90		12.6628	12.6628	0	2	2	5.8	1	1	topical
10	120		13.5786	13.5786	0	2	2	5.8	1	1	topical
10	180		15.5614	15.5614	0	2	2	5.8	1	1	topical
10	360		20.1898	20.1898	0	2	2	5.8	1	1	topical
10	720		17.5395	17.5395	0	2	2	5.8	1	1	topical
10	1440		16.4097	16.4097	0	2	2	5.8	1	1	topical
10	2160		15.0513	15.0513	0	2	2	5.8	1	1	topical
10	2880		11.1499	11.1499	0	2	2	5.8	1	1	topical
10	3600		11.6304	11.6304	0	2	2	5.8	1	1	topical
10	4320		6.43083	6.43083	0	2	2	5.8	1	1	topical
10	5040		9.15768	9.15768	0	2	2	5.8	1	1	topical
10	5760		4.05047	4.05047	0	2	2	5.8	1	1	topical
10	6480		4.18619	4.18619	0	2	2	5.8	1	1	topical
10	7200		2.44265	2.44265	0	2	2	5.8	1	1	topical
10	7920		3.41763	3.41763	0	2	2	5.8	1	1	topical
11	0	20000	.	.	0	2	2	6.2	1	1	topical
11	90		2.88482	2.88482	0	2	2	6.2	1	1	topical
11	120		4.37899	4.37899	0	2	2	6.2	1	1	topical
11	180		6.30078	6.30078	0	2	2	6.2	1	1	topical
11	360		12.1635	12.1635	0	2	2	6.2	1	1	topical
11	720		13.6474	13.6474	0	2	2	6.2	1	1	topical
11	1440		14.1922	14.1922	0	2	2	6.2	1	1	topical
11	2160		20.0292	20.0292	0	2	2	6.2	1	1	topical
11	2880		18.2486	18.2486	0	2	2	6.2	1	1	topical
11	3600		12.0093	12.0093	0	2	2	6.2	1	1	topical
11	4320		9.07019	9.07019	0	2	2	6.2	1	1	topical
11	5040		7.35483	7.35483	0	2	2	6.2	1	1	topical
11	5760		4.83857	4.83857	0	2	2	6.2	1	1	topical
11	6480		3.50823	3.50823	0	2	2	6.2	1	1	topical
11	7200		2.50082	2.50082	0	2	2	6.2	1	1	topical
11	7920		2.93937	2.93937	0	2	2	6.2	1	1	topical
12	0	26240	.	.	0	2	2	8.2	1	1	topical
12	15		6.15506	6.15506	0	2	2	8.2	1	1	topical
12	30		13.2205	13.2205	0	2	2	8.2	1	1	topical
12	45		15.499	15.499	0	2	2	8.2	1	1	topical
12	60		28.5575	28.5575	0	2	2	8.2	1	1	topical
12	90		29.9933	29.9933	0	2	2	8.2	1	1	topical
12	120		27.7988	27.7988	0	2	2	8.2	1	1	topical
12	180		27.6537	27.6537	0	2	2	8.2	1	1	topical
12	360		25.9605	25.9605	0	2	2	8.2	1	1	topical
12	720		15.8023	15.8023	0	2	2	8.2	1	1	topical
12	1440		16.0232	16.0232	0	2	2	8.2	1	1	topical
12	2160		11.9557	11.9557	0	2	2	8.2	1	1	topical
12	2880		9.19615	9.19615	0	2	2	8.2	1	1	topical
12	3600		9.0444	9.0444	0	2	2	8.2	1	1	topical
12	4320		8.62247	8.62247	0	2	2	8.2	1	1	topical
12	5040		3.11398	3.11398	0	2	2	8.2	1	1	topical
12	5760		2.84851	2.84851	0	2	2	8.2	1	1	topical
12	6480		2.07022	2.07022	0	2	2	8.2	1	1	topical
13	0	21840	.	.	0	2	2	7	1	1	topical
13	30		2.2086	2.2086	0	2	2	7	1	1	topical
13	45		4.06955	4.06955	0	2	2	7	1	1	topical
13	60		5.5122	5.5122	0	2	2	7	1	1	topical
13	90		7.32123	7.32123	0	2	2	7	1	1	topical
13	120		10.6227	10.6227	0	2	2	7	1	1	topical
13	180		12.9831	12.9831	0	2	2	7	1	1	topical
13	360		10.4984	10.4984	0	2	2	7	1	1	topical
13	720		18.9105	18.9105	0	2	2	7	1	1	topical
13	1440		14.8591	14.8591	0	2	2	7	1	1	topical
13	2160		16.6965	16.6965	0	2	2	7	1	1	topical
13	2880		14.3981	14.3981	0	2	2	7	1	1	topical
13	3600		11.6559	11.6559	0	2	2	7	1	1	topical
13	4320		11.5542	11.5542	0	2	2	7	1	1	topical
13	5040		7.49797	7.49797	0	2	2	7	1	1	topical
13	5760		5.13018	5.13018	0	2	2	7	1	1	topical
13	6480		3.22047	3.22047	0	2	2	7	1	1	topical
13	7200		2.5641	2.5641	0	2	2	7	1	1	topical
13	7920		2.058	2.058	0	2	2	7	1	1	topical
14	0	25630	.	.	0	2	2	8	1	1	topical
14	60		2.32192	2.32192	0	2	2	8	1	1	topical
14	90		3.87807	3.87807	0	2	2	8	1	1	topical
14	120		6.44616	6.44616	0	2	2	8	1	1	topical
14	180		9.00042	9.00042	0	2	2	8	1	1	topical
14	360		11.9351	11.9351	0	2	2	8	1	1	topical
14	720		11.3211	11.3211	0	2	2	8	1	1	topical
14	1440		13.7703	13.7703	0	2	2	8	1	1	topical
14	2160		11.0102	11.0102	0	2	2	8	1	1	topical
14	2880		9.54033	9.54033	0	2	2	8	1	1	topical
14	3600		7.21887	7.21887	0	2	2	8	1	1	topical
14	4320		5.37397	5.37397	0	2	2	8	1	1	topical
14	5040		3.42903	3.42903	0	2	2	8	1	1	topical
14	5760		2.48145	2.48145	0	2	2	8	1	1	topical
15	0	25560	.	.	0	2	2	8	1	1	topical
15	15		9.99549	9.99549	0	2	2	8	1	1	topical
15	30		25.4765	25.4765	0	2	2	8	1	1	topical
15	45		35.4356	35.4356	0	2	2	8	1	1	topical
15	60		46.6034	46.6034	0	2	2	8	1	1	topical
15	90		62.6419	62.6419	0	2	2	8	1	1	topical
15	120		70.2403	70.2403	0	2	2	8	1	1	topical
15	180		72.5028	72.5028	0	2	2	8	1	1	topical
15	360		50.562	50.562	0	2	2	8	1	1	topical
15	720		36.6211	36.6211	0	2	2	8	1	1	topical
15	1440		29.5785	29.5785	0	2	2	8	1	1	topical
15	2160		26.7407	26.7407	0	2	2	8	1	1	topical
15	2880		23.2674	23.2674	0	2	2	8	1	1	topical
15	3600		16.725	16.725	0	2	2	8	1	1	topical
15	4320		12.8563	12.8563	0	2	2	8	1	1	topical
15	5040		10.3231	10.3231	0	2	2	8	1	1	topical
15	5760		7.37938	7.37938	0	2	2	8	1	1	topical
15	6480		5.0259	5.0259	0	2	2	8	1	1	topical
15	7200		2.34966	2.34966	0	2	2	8	1	1	topical
15	7920		3.65536	3.65536	0	2	2	8	1	1	topical
16	0	15400	.	.	0	4	2	7	0	0	iv
16	5		11348.1	11348.1	0	4	2	7	0	0	iv
16	15		7052.32	7052.32	0	4	2	7	0	0	iv
16	30		5834.67	5834.67	0	4	2	7	0	0	iv
16	45		5141.34	5141.34	0	4	2	7	0	0	iv
16	60		4967.21	4967.21	0	4	2	7	0	0	iv
16	90		3247.52	3247.52	0	4	2	7	0	0	iv
16	120		2377.95	2377.95	0	4	2	7	0	0	iv
16	180		1419.11	1419.11	0	4	2	7	0	0	iv
16	360		914.023	914.023	0	4	2	7	0	0	iv
16	720		292.043	292.043	0	4	2	7	0	0	iv
16	1440		19.4243	19.4243	0	4	2	7	0	0	iv
16	2160		2.11628	2.11628	0	4	2	7	0	0	iv
2	0	12320	.	.	0	4	2	5.6	0	0	iv
2	5		10238.4	10238.4	0	4	2	5.6	0	0	iv
2	15		5937.32	5937.32	0	4	2	5.6	0	0	iv
2	30		4943.48	4943.48	0	4	2	5.6	0	0	iv
2	45		3566.87	3566.87	0	4	2	5.6	0	0	iv
2	60		2938.96	2938.96	0	4	2	5.6	0	0	iv
2	90		1415.76	1415.76	0	4	2	5.6	0	0	iv
2	120		582.293	582.293	0	4	2	5.6	0	0	iv
2	180		312.787	312.787	0	4	2	5.6	0	0	iv
2	360		473.39	473.39	0	4	2	5.6	0	0	iv
2	720		338.484	338.484	0	4	2	5.6	0	0	iv
2	1440		89.0988	89.0988	0	4	2	5.6	0	0	iv
2	2160		18.8154	18.8154	0	4	2	5.6	0	0	iv
2	2880		5.19136	5.19136	0	4	2	5.6	0	0	iv
3	0	13200	.	.	0	4	2	6	0	0	iv
3	5		10663.6	10663.6	0	4	2	6	0	0	iv
3	15		5733.77	5733.77	0	4	2	6	0	0	iv
3	30		4520.71	4520.71	0	4	2	6	0	0	iv
3	45		3504.79	3504.79	0	4	2	6	0	0	iv
3	60		2849.17	2849.17	0	4	2	6	0	0	iv
3	90		1415.33	1415.33	0	4	2	6	0	0	iv
3	120		809.87	809.87	0	4	2	6	0	0	iv
3	180		344.34	344.34	0	4	2	6	0	0	iv
3	360		568.129	568.129	0	4	2	6	0	0	iv
3	720		298.196	298.196	0	4	2	6	0	0	iv
3	1440		49.2898	49.2898	0	4	2	6	0	0	iv
3	2160		12.0628	12.0628	0	4	2	6	0	0	iv
3	2880		3.08034	3.08034	0	4	2	6	0	0	iv
4	0	18920	.	.	0	4	2	8.6	0	0	iv
4	5		11958.5	11958.5	0	4	2	8.6	0	0	iv
4	15		5733.8	5733.8	0	4	2	8.6	0	0	iv
4	30		4339.69	4339.69	0	4	2	8.6	0	0	iv
4	45		3331.61	3331.61	0	4	2	8.6	0	0	iv
4	60		2141.8	2141.8	0	4	2	8.6	0	0	iv
4	90		1090.13	1090.13	0	4	2	8.6	0	0	iv
4	120		488.934	488.934	0	4	2	8.6	0	0	iv
4	180		380.03	380.03	0	4	2	8.6	0	0	iv
4	360		452.026	452.026	0	4	2	8.6	0	0	iv
4	720		398.638	398.638	0	4	2	8.6	0	0	iv
4	1440		82.0517	82.0517	0	4	2	8.6	0	0	iv
4	2160		22.2714	22.2714	0	4	2	8.6	0	0	iv
4	2880		5.13657	5.13657	0	4	2	8.6	0	0	iv
5	0	13640	.	.	0	4	2	6.2	0	0	iv
5	5		2303.34	2303.34	0	4	2	6.2	0	0	iv
5	15		3412.6	3412.6	0	4	2	6.2	0	0	iv
5	30		3567.71	3567.71	0	4	2	6.2	0	0	iv
5	45		3480.84	3480.84	0	4	2	6.2	0	0	iv
5	60		3147.69	3147.69	0	4	2	6.2	0	0	iv
5	90		2650.96	2650.96	0	4	2	6.2	0	0	iv
5	120		2086.65	2086.65	0	4	2	6.2	0	0	iv
5	180		1319.66	1319.66	0	4	2	6.2	0	0	iv
5	360		685.81	685.81	0	4	2	6.2	0	0	iv
5	720		339.514	339.514	0	4	2	6.2	0	0	iv
5	1440		102.122	102.122	0	4	2	6.2	0	0	iv
5	2160		20.8021	20.8021	0	4	2	6.2	0	0	iv
5	2880		8.31846	8.31846	0	4	2	6.2	0	0	iv
5	3600		3.96428	3.96428	0	4	2	6.2	0	0	iv
6	0	14520	.	.	0	4	2	6.6	0	0	iv
6	5		12173.8	12173.8	0	4	2	6.6	0	0	iv
6	15		5686.09	5686.09	0	4	2	6.6	0	0	iv
6	30		4860.98	4860.98	0	4	2	6.6	0	0	iv
6	45		4531.76	4531.76	0	4	2	6.6	0	0	iv
6	60		3542.75	3542.75	0	4	2	6.6	0	0	iv
6	90		7192.67	7192.67	0	4	2	6.6	0	0	iv
6	120		2199.99	2199.99	0	4	2	6.6	0	0	iv
6	180		866.264	866.264	0	4	2	6.6	0	0	iv
6	360		269.155	269.155	0	4	2	6.6	0	0	iv
6	720		244.908	244.908	0	4	2	6.6	0	0	iv
6	1440		38.8375	38.8375	0	4	2	6.6	0	0	iv
6	2160		6.32857	6.32857	0	4	2	6.6	0	0	iv
6	2880		1.60955	1.60955	0	4	2	6.6	0	0	iv
7	0	16280	.	.	0	4	2	7.4	0	0	iv
7	5		26455.4	26455.4	0	4	2	7.4	0	0	iv
7	15		9345.88	9345.88	0	4	2	7.4	0	0	iv
7	30		6038.87	6038.87	0	4	2	7.4	0	0	iv
7	45		4786.05	4786.05	0	4	2	7.4	0	0	iv
7	60		3592.49	3592.49	0	4	2	7.4	0	0	iv
7	90		1583.92	1583.92	0	4	2	7.4	0	0	iv
7	120		766.265	766.265	0	4	2	7.4	0	0	iv
7	180		278.274	278.274	0	4	2	7.4	0	0	iv
7	360		746.708	746.708	0	4	2	7.4	0	0	iv
7	720		274.362	274.362	0	4	2	7.4	0	0	iv
7	1440		52.9451	52.9451	0	4	2	7.4	0	0	iv
7	2160		15.3297	15.3297	0	4	2	7.4	0	0	iv
7	2880		3.3877	3.3877	0	4	2	7.4	0	0	iv
8	0	18920	.	.	0	4	2	8.6	0	0	iv
8	5		17457.7	17457.7	0	4	2	8.6	0	0	iv
8	15		10355.3	10355.3	0	4	2	8.6	0	0	iv
8	30		4702.82	4702.82	0	4	2	8.6	0	0	iv
8	45		3890.98	3890.98	0	4	2	8.6	0	0	iv
8	60		2797.68	2797.68	0	4	2	8.6	0	0	iv
8	90		1548.88	1548.88	0	4	2	8.6	0	0	iv
8	120		762.402	762.402	0	4	2	8.6	0	0	iv
8	180		375.442	375.442	0	4	2	8.6	0	0	iv
8	360		753.405	753.405	0	4	2	8.6	0	0	iv
8	720		331.447	331.447	0	4	2	8.6	0	0	iv
8	1440		66.2001	66.2001	0	4	2	8.6	0	0	iv
8	2160		7.3748	7.3748	0	4	2	8.6	0	0	iv
17	0	13500	.	.	0	1	1	4.1	0	1	oral
17	15		3755	3755	0	1	1	4.1	0	1	oral
17	30		4322	4322	0	1	1	4.1	0	1	oral
17	45		4733	4733	0	1	1	4.1	0	1	oral
17	60		6430	6430	0	1	1	4.1	0	1	oral
17	90		4337	4337	0	1	1	4.1	0	1	oral
17	120		4220	4220	0	1	1	4.1	0	1	oral
17	180		3597	3597	0	1	1	4.1	0	1	oral
17	360		1976	1976	0	1	1	4.1	0	1	oral
17	720		974	974	0	1	1	4.1	0	1	oral
17	1440		274	274	0	1	1	4.1	0	1	oral
17	2160		47	47	0	1	1	4.1	0	1	oral
17	2880		25	25	0	1	1	4.1	0	1	oral
17	3600		9	9	0	1	1	4.1	0	1	oral
17	4320		5	5	0	1	1	4.1	0	1	oral
18	0	11500	.	.	0	1	1	3.45	0	0	oral
18	15		1094	1094	0	1	1	3.45	0	0	oral
18	30		1693	1693	0	1	1	3.45	0	0	oral
18	45		1664	1664	0	1	1	3.45	0	0	oral
18	60		1504	1504	0	1	1	3.45	0	0	oral
18	90		1451	1451	0	1	1	3.45	0	0	oral
18	120		1405	1405	0	1	1	3.45	0	0	oral
18	180		1082	1082	0	1	1	3.45	0	0	oral
18	720		238	238	0	1	1	3.45	0	0	oral
18	1440		71	71	0	1	1	3.45	0	0	oral
18	2160		20	20	0	1	1	3.45	0	0	oral
18	2880		12	12	0	1	1	3.45	0	0	oral
18	3600		5	5	0	1	1	3.45	0	0	oral
18	4320		2	2	0	1	1	3.45	0	0	oral
19	0	9000	.	.	0	1	1	2.68	0	1	oral
19	15		4696	4696	0	1	1	2.68	0	1	oral
19	30		6475	6475	0	1	1	2.68	0	1	oral
19	45		6804	6804	0	1	1	2.68	0	1	oral
19	60		6886	6886	0	1	1	2.68	0	1	oral
19	90		6359	6359	0	1	1	2.68	0	1	oral
19	120		4649	4649	0	1	1	2.68	0	1	oral
19	180		3660	3660	0	1	1	2.68	0	1	oral
19	360		1141	1141	0	1	1	2.68	0	1	oral
19	720		426	426	0	1	1	2.68	0	1	oral
19	1440		96	96	0	1	1	2.68	0	1	oral
19	2160		47	47	0	1	1	2.68	0	1	oral
19	2880		21	21	0	1	1	2.68	0	1	oral
19	3600		13	13	0	1	1	2.68	0	1	oral
19	4320		5	5	0	1	1	2.68	0	1	oral
20	0	9500	.	.	0	1	1	2.87	0	1	oral
20	15		3355	3355	0	1	1	2.87	0	1	oral
20	30		3777	3777	0	1	1	2.87	0	1	oral
20	45		4505	4505	0	1	1	2.87	0	1	oral
20	60		3736	3736	0	1	1	2.87	0	1	oral
20	90		3613	3613	0	1	1	2.87	0	1	oral
20	120		2587	2587	0	1	1	2.87	0	1	oral
20	180		1478	1478	0	1	1	2.87	0	1	oral
20	360		914	914	0	1	1	2.87	0	1	oral
20	720		256	256	0	1	1	2.87	0	1	oral
20	1440		190	190	0	1	1	2.87	0	1	oral
20	2160		43	43	0	1	1	2.87	0	1	oral
20	2880		26	26	0	1	1	2.87	0	1	oral
20	3600		12	12	0	1	1	2.87	0	1	oral
20	4320		6	6	0	1	1	2.87	0	1	oral
22	0	9000	.	.	0	1	1	2.68	0	1	oral
22	15		4883	4883	0	1	1	2.68	0	1	oral
22	30		4087	4087	0	1	1	2.68	0	1	oral
22	45		4102	4102	0	1	1	2.68	0	1	oral
22	60		4508	4508	0	1	1	2.68	0	1	oral
22	90		4055	4055	0	1	1	2.68	0	1	oral
22	120		3404	3404	0	1	1	2.68	0	1	oral
22	180		2310	2310	0	1	1	2.68	0	1	oral
22	360		864	864	0	1	1	2.68	0	1	oral
22	720		655	655	0	1	1	2.68	0	1	oral
22	1440		351	351	0	1	1	2.68	0	1	oral
22	2160		67	67	0	1	1	2.68	0	1	oral
22	2880		36	36	0	1	1	2.68	0	1	oral
22	3600		14	14	0	1	1	2.68	0	1	oral
22	4320		8	8	0	1	1	2.68	0	1	oral
23	0	11000	.	.	0	1	1	3.4	0	1	oral
23	15		2180	2180	0	1	1	3.4	0	1	oral
23	30		3247	3247	0	1	1	3.4	0	1	oral
23	45		3791	3791	0	1	1	3.4	0	1	oral
23	60		3810	3810	0	1	1	3.4	0	1	oral
23	90		3801	3801	0	1	1	3.4	0	1	oral
23	120		4686	4686	0	1	1	3.4	0	1	oral
23	180		3887	3887	0	1	1	3.4	0	1	oral
23	360		2207	2207	0	1	1	3.4	0	1	oral
23	720		860	860	0	1	1	3.4	0	1	oral
23	1440		319	319	0	1	1	3.4	0	1	oral
23	2160		82	82	0	1	1	3.4	0	1	oral
23	2880		41	41	0	1	1	3.4	0	1	oral
23	3600		17	17	0	1	1	3.4	0	1	oral
23	4320		10	10	0	1	1	3.4	0	1	oral
24	0	8500	.	.	0	1	1	2.64	0	1	oral
24	15		2986	2986	0	1	1	2.64	0	1	oral
24	30		4413	4413	0	1	1	2.64	0	1	oral
24	45		5778	5778	0	1	1	2.64	0	1	oral
24	60		5878	5878	0	1	1	2.64	0	1	oral
24	90		5200	5200	0	1	1	2.64	0	1	oral
24	120		4579	4579	0	1	1	2.64	0	1	oral
24	180		3708	3708	0	1	1	2.64	0	1	oral
24	360		1496	1496	0	1	1	2.64	0	1	oral
24	720		1120	1120	0	1	1	2.64	0	1	oral
24	1440		267	267	0	1	1	2.64	0	1	oral
24	2160		85	85	0	1	1	2.64	0	1	oral
24	2880		40	40	0	1	1	2.64	0	1	oral
24	3600		22	22	0	1	1	2.64	0	1	oral
24	4320		12	12	0	1	1	2.64	0	1	oral
25	0	11500	.	.	0	2	1	3.49	1	1	topical
25	15		2	2	1	2	1	3.49	1	1	topical
25	30		2	2	1	2	1	3.49	1	1	topical
25	45		2	2	1	2	1	3.49	1	1	topical
25	60		2	2	1	2	1	3.49	1	1	topical
25	90		8	8	0	2	1	3.49	1	1	topical
25	120		2	2	1	2	1	3.49	1	1	topical
25	180		4	4	0	2	1	3.49	1	1	topical
25	360		13	13	0	2	1	3.49	1	1	topical
25	720		28	28	0	2	1	3.49	1	1	topical
25	1440		56	56	0	2	1	3.49	1	1	topical
25	2160		40	40	0	2	1	3.49	1	1	topical
25	2880		46	46	0	2	1	3.49	1	1	topical
25	3600		36	36	0	2	1	3.49	1	1	topical
25	4320		29	29	0	2	1	3.49	1	1	topical
26	0	10500	.	.	0	2	1	3.22	1	1	topical
26	15		2	2	1	2	1	3.22	1	1	topical
26	30		2	2	1	2	1	3.22	1	1	topical
26	45		2	2	1	2	1	3.22	1	1	topical
26	60		2	2	1	2	1	3.22	1	1	topical
26	90		4	4	0	2	1	3.22	1	1	topical
26	120		2	2	0	2	1	3.22	1	1	topical
26	180		4	4	0	2	1	3.22	1	1	topical
26	360		8	8	0	2	1	3.22	1	1	topical
26	720		14	14	0	2	1	3.22	1	1	topical
26	1440		22	22	0	2	1	3.22	1	1	topical
26	2160		18	18	0	2	1	3.22	1	1	topical
26	2880		20	20	0	2	1	3.22	1	1	topical
26	3600		12	12	0	2	1	3.22	1	1	topical
26	4320		12	12	0	2	1	3.22	1	1	topical
27	0	9000	.	.	0	2	1	2.73	1	1	topical
27	15		2	2	1	2	1	2.73	1	1	topical
27	30		2	2	1	2	1	2.73	1	1	topical
27	45		2	2	1	2	1	2.73	1	1	topical
27	60		2	2	1	2	1	2.73	1	1	topical
27	90		2	2	1	2	1	2.73	1	1	topical
27	120		2	2	0	2	1	2.73	1	1	topical
27	180		4	4	0	2	1	2.73	1	1	topical
27	360		11	11	0	2	1	2.73	1	1	topical
27	720		31	31	0	2	1	2.73	1	1	topical
27	1440		38	38	0	2	1	2.73	1	1	topical
27	2160		35	35	0	2	1	2.73	1	1	topical
27	2880		41	41	0	2	1	2.73	1	1	topical
27	3600		39	39	0	2	1	2.73	1	1	topical
27	4320		36	36	0	2	1	2.73	1	1	topical
28	0	12000	.	.	0	2	1	3.71	1	1	topical
28	15		2	2	1	2	1	3.71	1	1	topical
28	30		2	2	1	2	1	3.71	1	1	topical
28	45		2	2	1	2	1	3.71	1	1	topical
28	60		2	2	1	2	1	3.71	1	1	topical
28	90		4	4	0	2	1	3.71	1	1	topical
28	120		2	2	0	2	1	3.71	1	1	topical
28	180		7	7	0	2	1	3.71	1	1	topical
28	360		12	12	0	2	1	3.71	1	1	topical
28	720		19	19	0	2	1	3.71	1	1	topical
28	1440		30	30	0	2	1	3.71	1	1	topical
28	2160		26	26	0	2	1	3.71	1	1	topical
28	2880		21	21	0	2	1	3.71	1	1	topical
28	3600		17	17	0	2	1	3.71	1	1	topical
28	4320		18	18	0	2	1	3.71	1	1	topical
29	0	15000	.	.	0	2	1	4.57	1	1	topical
29	15		2	2	1	2	1	4.57	1	1	topical
29	30		2	2	1	2	1	4.57	1	1	topical
29	45		2	2	1	2	1	4.57	1	1	topical
29	90		2	2	1	2	1	4.57	1	1	topical
29	120		2	2	1	2	1	4.57	1	1	topical
29	180		4	4	0	2	1	4.57	1	1	topical
29	360		8	8	0	2	1	4.57	1	1	topical
29	720		11	11	0	2	1	4.57	1	1	topical
29	1440		13	13	0	2	1	4.57	1	1	topical
29	2160		11	11	0	2	1	4.57	1	1	topical
29	3600		8	8	0	2	1	4.57	1	1	topical
29	4320		6	6	0	2	1	4.57	1	1	topical
30	0	9500	.	.	0	2	1	2.95	1	1	topical
30	15		2	2	1	2	1	2.95	1	1	topical
30	30		2	2	1	2	1	2.95	1	1	topical
30	45		2	2	1	2	1	2.95	1	1	topical
30	60		2	2	1	2	1	2.95	1	1	topical
30	90		2	2	1	2	1	2.95	1	1	topical
30	120		2	2	1	2	1	2.95	1	1	topical
30	180		4	4	0	2	1	2.95	1	1	topical
30	360		11	11	0	2	1	2.95	1	1	topical
30	720		17	17	0	2	1	2.95	1	1	topical
30	1440		25	25	0	2	1	2.95	1	1	topical
30	2160		41	41	0	2	1	2.95	1	1	topical
30	2880		10	10	0	2	1	2.95	1	1	topical
30	3600		29	29	0	2	1	2.95	1	1	topical
30	4320		22	22	0	2	1	2.95	1	1	topical
31	0	11500	.	.	0	2	1	3.56	1	1	topical
31	15		2	2	1	2	1	3.56	1	1	topical
31	30		2	2	1	2	1	3.56	1	1	topical
31	45		2	2	1	2	1	3.56	1	1	topical
31	60		2	2	1	2	1	3.56	1	1	topical
31	90		8	8	0	2	1	3.56	1	1	topical
31	120		2	2	1	2	1	3.56	1	1	topical
31	180		4	4	0	2	1	3.56	1	1	topical
31	360		12	12	0	2	1	3.56	1	1	topical
31	720		30	30	0	2	1	3.56	1	1	topical
31	1440		35	35	0	2	1	3.56	1	1	topical
31	2160		51	51	0	2	1	3.56	1	1	topical
31	2880		43	43	0	2	1	3.56	1	1	topical
31	3600		54	54	0	2	1	3.56	1	1	topical
31	4320		43	43	0	2	1	3.56	1	1	topical
32	0	14000	.	.	0	2	1	4.3	1	1	topical
32	15		2	2	1	2	1	4.3	1	1	topical
32	30		2	2	1	2	1	4.3	1	1	topical
32	45		2	2	1	2	1	4.3	1	1	topical
32	60		2	2	0	2	1	4.3	1	1	topical
32	90		5	5	0	2	1	4.3	1	1	topical
32	120		9	9	0	2	1	4.3	1	1	topical
32	180		15	15	0	2	1	4.3	1	1	topical
32	360		28	28	0	2	1	4.3	1	1	topical
32	720		33	33	0	2	1	4.3	1	1	topical
32	1440		31	31	0	2	1	4.3	1	1	topical
32	2160		24	24	0	2	1	4.3	1	1	topical
32	2880		18	18	0	2	1	4.3	1	1	topical
32	3600		15	15	0	2	1	4.3	1	1	topical
32	4320		11	11	0	2	1	4.3	1	1	topical
34	0	5500	.	.	0	3	1	2.45	0	1	intramuscular
34	15		6543	6543	0	3	1	2.45	0	1	intramuscular
34	30		4780	4780	0	3	1	2.45	0	1	intramuscular
34	45		4167	4167	0	3	1	2.45	0	1	intramuscular
34	60		3388	3388	0	3	1	2.45	0	1	intramuscular
34	90		1799	1799	0	3	1	2.45	0	1	intramuscular
34	120		1147	1147	0	3	1	2.45	0	1	intramuscular
34	180		700	700	0	3	1	2.45	0	1	intramuscular
34	360		600	600	0	3	1	2.45	0	1	intramuscular
34	720		233	233	0	3	1	2.45	0	1	intramuscular
34	1440		55	55	0	3	1	2.45	0	1	intramuscular
34	2160		26	26	0	3	1	2.45	0	1	intramuscular
34	2880		10	10	0	3	1	2.45	0	1	intramuscular
34	3600		3	3	0	3	1	2.45	0	1	intramuscular
34	4320		2	2	1	3	1	2.45	0	1	intramuscular
35	0	9500	.	.	0	3	1	4.3	0	1	intramuscular
35	15		4729	4729	0	3	1	4.3	0	1	intramuscular
35	30		5251	5251	0	3	1	4.3	0	1	intramuscular
35	45		5074	5074	0	3	1	4.3	0	1	intramuscular
35	60		4784	4784	0	3	1	4.3	0	1	intramuscular
35	90		3951	3951	0	3	1	4.3	0	1	intramuscular
35	120		3260	3260	0	3	1	4.3	0	1	intramuscular
35	180		2310	2310	0	3	1	4.3	0	1	intramuscular
35	360		1425	1425	0	3	1	4.3	0	1	intramuscular
35	720		879	879	0	3	1	4.3	0	1	intramuscular
35	1440		237	237	0	3	1	4.3	0	1	intramuscular
35	2160		89	89	0	3	1	4.3	0	1	intramuscular
35	2880		30	30	0	3	1	4.3	0	1	intramuscular
35	3600		14	14	0	3	1	4.3	0	1	intramuscular
35	4320		8	8	0	3	1	4.3	0	1	intramuscular
36	0	6500	.	.	0	3	1	3.04	0	1	intramuscular
36	15		3807	3807	0	3	1	3.04	0	1	intramuscular
36	30		4454	4454	0	3	1	3.04	0	1	intramuscular
36	45		4578	4578	0	3	1	3.04	0	1	intramuscular
36	60		4205	4205	0	3	1	3.04	0	1	intramuscular
36	90		3010	3010	0	3	1	3.04	0	1	intramuscular
36	120		1893	1893	0	3	1	3.04	0	1	intramuscular
36	180		967	967	0	3	1	3.04	0	1	intramuscular
36	360		627	627	0	3	1	3.04	0	1	intramuscular
36	720		506	506	0	3	1	3.04	0	1	intramuscular
36	1440		115	115	0	3	1	3.04	0	1	intramuscular
36	2160		52	52	0	3	1	3.04	0	1	intramuscular
36	2880		14	14	0	3	1	3.04	0	1	intramuscular
36	3600		11	11	0	3	1	3.04	0	1	intramuscular
36	4320		5	5	0	3	1	3.04	0	1	intramuscular
37	0	9000	.	.	0	3	1	4.02	0	1	intramuscular
37	15		6767	6767	0	3	1	4.02	0	1	intramuscular
37	30		5397	5397	0	3	1	4.02	0	1	intramuscular
37	45		5436	5436	0	3	1	4.02	0	1	intramuscular
37	60		4373	4373	0	3	1	4.02	0	1	intramuscular
37	90		3508	3508	0	3	1	4.02	0	1	intramuscular
37	120		2577	2577	0	3	1	4.02	0	1	intramuscular
37	180		1815	1815	0	3	1	4.02	0	1	intramuscular
37	360		1081	1081	0	3	1	4.02	0	1	intramuscular
37	720		669	669	0	3	1	4.02	0	1	intramuscular
37	1440		160	160	0	3	1	4.02	0	1	intramuscular
37	2160		55	55	0	3	1	4.02	0	1	intramuscular
37	2880		15	15	0	3	1	4.02	0	1	intramuscular
37	3600		38	38	0	3	1	4.02	0	1	intramuscular
37	4320		6	6	0	3	1	4.02	0	1	intramuscular
38	0	9000	.	.	0	3	1	4.09	0	1	intramuscular
38	15		6324	6324	0	3	1	4.09	0	1	intramuscular
38	30		6045	6045	0	3	1	4.09	0	1	intramuscular
38	45		6033	6033	0	3	1	4.09	0	1	intramuscular
38	60		6643	6643	0	3	1	4.09	0	1	intramuscular
38	90		4690	4690	0	3	1	4.09	0	1	intramuscular
38	120		4493	4493	0	3	1	4.09	0	1	intramuscular
38	180		3312	3312	0	3	1	4.09	0	1	intramuscular
38	360		1707	1707	0	3	1	4.09	0	1	intramuscular
38	720		1038	1038	0	3	1	4.09	0	1	intramuscular
38	1440		229	229	0	3	1	4.09	0	1	intramuscular
38	2160		89	89	0	3	1	4.09	0	1	intramuscular
38	2880		47	47	0	3	1	4.09	0	1	intramuscular
38	3600		33	33	0	3	1	4.09	0	1	intramuscular
38	4320		16	16	0	3	1	4.09	0	1	intramuscular
39	0	7000	.	.	0	3	1	3.27	0	1	intramuscular
39	15		8134	8134	0	3	1	3.27	0	1	intramuscular
39	30		9214	9214	0	3	1	3.27	0	1	intramuscular
39	45		4936	4936	0	3	1	3.27	0	1	intramuscular
39	60		6590	6590	0	3	1	3.27	0	1	intramuscular
39	90		4974	4974	0	3	1	3.27	0	1	intramuscular
39	120		3969	3969	0	3	1	3.27	0	1	intramuscular
39	180		2914	2914	0	3	1	3.27	0	1	intramuscular
39	360		1678	1678	0	3	1	3.27	0	1	intramuscular
39	720		933	933	0	3	1	3.27	0	1	intramuscular
39	1440		206	206	0	3	1	3.27	0	1	intramuscular
39	2160		234	234	0	3	1	3.27	0	1	intramuscular
39	2880		135	135	0	3	1	3.27	0	1	intramuscular
39	3600		21	21	0	3	1	3.27	0	1	intramuscular
39	4320		11	11	0	3	1	3.27	0	1	intramuscular
40	0	7000	.	.	0	3	1	3.24	0	1	intramuscular
40	15		5872	5872	0	3	1	3.24	0	1	intramuscular
40	30		6104	6104	0	3	1	3.24	0	1	intramuscular
40	45		4774	4774	0	3	1	3.24	0	1	intramuscular
40	60		4831	4831	0	3	1	3.24	0	1	intramuscular
40	90		3166	3166	0	3	1	3.24	0	1	intramuscular
40	120		2422	2422	0	3	1	3.24	0	1	intramuscular
40	180		1126	1126	0	3	1	3.24	0	1	intramuscular
40	360		1149	1149	0	3	1	3.24	0	1	intramuscular
40	720		602	602	0	3	1	3.24	0	1	intramuscular
40	1440		169	169	0	3	1	3.24	0	1	intramuscular
40	2160		62	62	0	3	1	3.24	0	1	intramuscular
40	2880		15	15	0	3	1	3.24	0	1	intramuscular
40	3600		11	11	0	3	1	3.24	0	1	intramuscular
40	4320		4	4	0	3	1	3.24	0	1	intramuscular
